# Supplementary material
Source: publisher figshare collection journal article supplement (https://diabetesjournals.figshare.com/articles/dataset/_/12272783)
Supplement: Supplementary file 1 [file 2]

## Enrollment

Assessed for eligibility (n = 222)

Lean CTRL (n = 16)

Excluded (n = 168)

- ♦ Not meeting inclusion criteria (n = 100)
- ♦ Declined to participate (n = 60)

Randomized (n = 62)

## Allocation

Assigned to RYGB (n = 31)

Assigned to RYGB + ET (n = 31)

## Follow-Up

Lost to follow-up (n = 10)

- . Did not undergo surgery (n = 3)
- . Withdrew after surgery for personal reasons (n = 7)

Lost to follow-up (n = 9)

- . Did not undergo surgery (n = 4)
- . Withdrew after surgery for personal reasons (n = 5)

## Analysis

Completed/Analysed by ITT (n = 21/31)

Completed/Analysed by ITT (n = 22/31)
